# Supplementary material for: Interplay between Transition-Metal K-edge XMCD and Magnetism in Prussian Blue Analogs
Source: PubMed Central journal article supplement — ACS Omega. 2022 Oct 4;7(41):36366–78. doi: 10.1021/acsomega.2c04049 (PMC9583310; doi:10.1021/acsomega.2c04049), 2022-10-04

## Supplementary Material for

### Interplay between transition metal K-edge XMCD and magnetism in Prussian blue analogs.

Adama N'Diaye,<sup>1</sup> Amélie Bordage,<sup>1</sup> Lucie Nataf,<sup>2</sup> François Baudalet,<sup>2</sup> Eric Rivière,<sup>1</sup> Anne Bleuzen<sup>1\*</sup>

<sup>1</sup>Institut de Chimie Moléculaire et des Matériaux d'Orsay, Université Paris-Saclay, CNRS, 15 rue Georges Clémenceau, 91405 Orsay, France

<sup>2</sup>Synchrotron SOLEIL, L'Orme des Merisiers, St Aubin, BP 48, 91192 Gif sur Yvette, France.

Corresponding author email address : anne.bleuzen@universite-paris-saclay.fr

#### Electronic Supplementary Information

Table S1. Normalized absolute value of the intensity of the pre-edge XMCD feature at the A and B K-edges.

S1. Cr K-edge XANES spectra of the **ACr** series.

S2. Fe K-edge XANES spectra of the **AFe** series.

S3. Intensities of the XMCD  $\alpha$  and  $\gamma$  peaks as a function of the intensity of the  $\delta$  peak.

S4. A K-edge XMCD signal compared to the adapted enlargement of the XANES spectrum over the pre-edge/rising edge and edge regions.

S5. Area under curve versus intensity for the main  $\delta$  peak of the XMCD signal at the Fe K-edge for the **AFe** series.

S6. Area under curve versus intensity for the main  $\delta$  peak of the XMCD signal at the Cr K-edge for the **ACr** series.

S7. Magnetic field dependence of the magnetization at 4K for the **AFe** and **ACr** series.

S8. Powder X-ray diffraction of CuFe PBAs containing an increasing amount of Cs<sup>+</sup> cations inserted in interstitial sites.

S9. Ni K-edge XANES spectra of **NiFe** and **NiCr**.

Table S1. Normalized absolute value of the intensity of the pre-edge XMCD feature at the A and B K-edges of **MnFe**, **CoFe**, **NiFe**, **CuFe**, **MnCr**, **FeCr**, **CoCr** and **NiCr**.

| Sample      | A K-edge   |                          | B K-edge                                          |                          |
|-------------|------------|--------------------------|---------------------------------------------------|--------------------------|
|             | I pre-edge | I pre-edge / I edge<br>% | I pre-edge<br>a <sub>1</sub> /a <sub>2</sub> (Fe) | I pre-edge / I edge<br>% |
| <b>MnFe</b> | 0.0001     | 2.5                      | 0.0013/0                                          | 35/0                     |
| <b>CoFe</b> | 0.0008     | 7                        | 0.0004/0                                          | 20/0                     |
| <b>NiFe</b> | 0.0005     | 9                        | 0.003/0                                           | 35/0                     |
| <b>CuFe</b> | -*         | -*                       | 0.002/0                                           | 25/0                     |
| <b>MnCr</b> | 0.00045    | 4                        | 0                                                 | 0                        |
| <b>FeCr</b> | 0.0005     | 2.5                      | 0                                                 | 0                        |
| <b>CoCr</b> | 0.0001     | 8                        | 0                                                 | 0                        |
| <b>NiCr</b> | 0.00085    | 15                       | 0                                                 | 0                        |

### S1. Cr K-edge XANES spectra of the **ACr** series.

The XANES spectra are displayed in figure a) and figure b) presents an enlargement of the spectra over the pre-edge region.

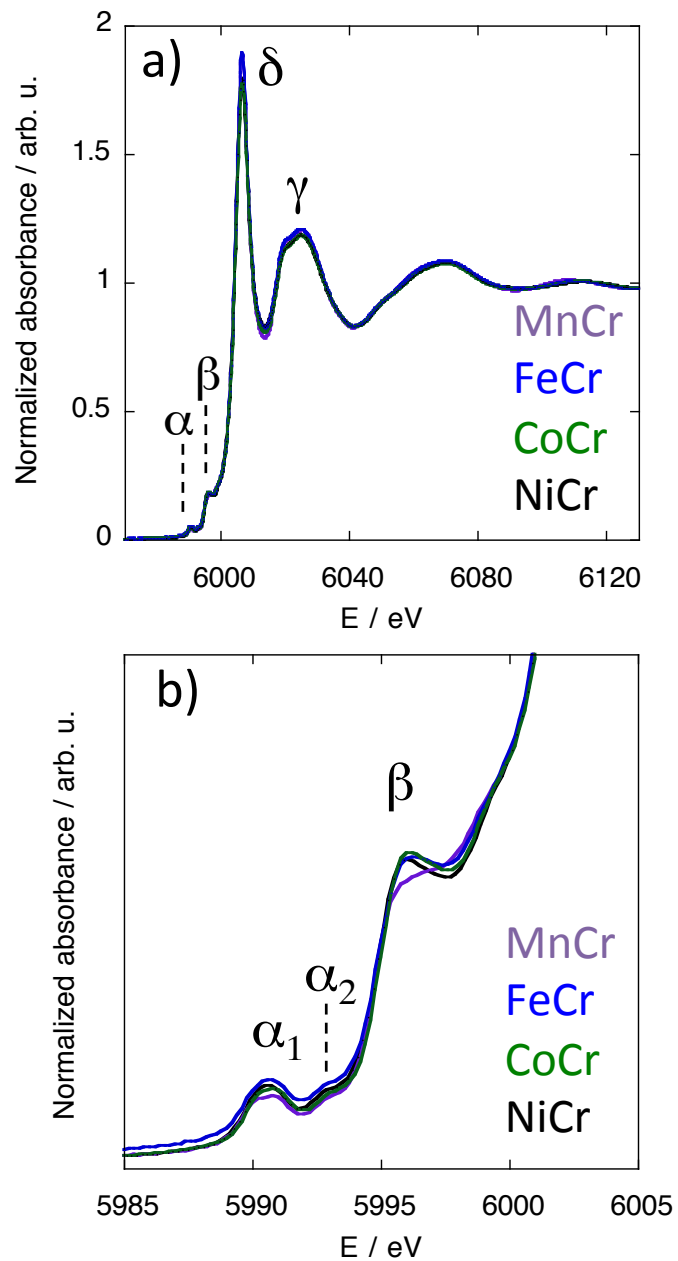

## S2. Fe K-edge XANES spectra of the **AFe** series.

The XANES spectra are displayed in figure a) and figure b) presents an enlargement of the spectra over the pre-edge region.

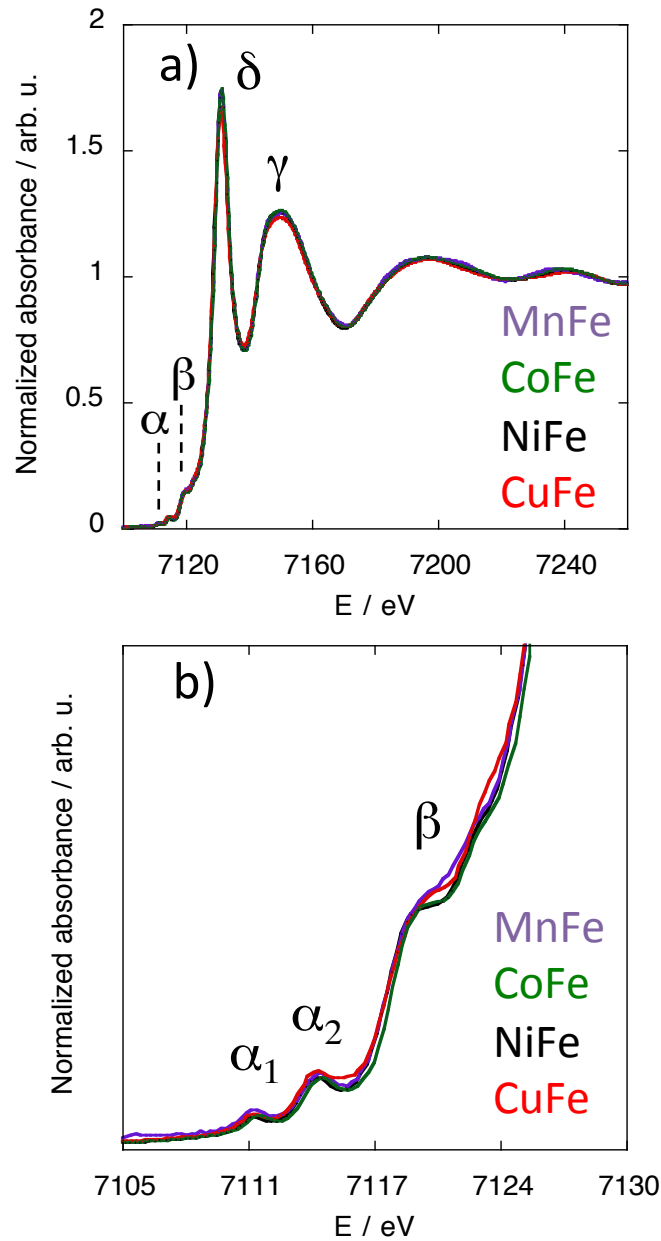

S3. Intensities of the Fe K-edge XMCD  $\alpha$  pea as a function of the intensity of the  $\delta$  peak.

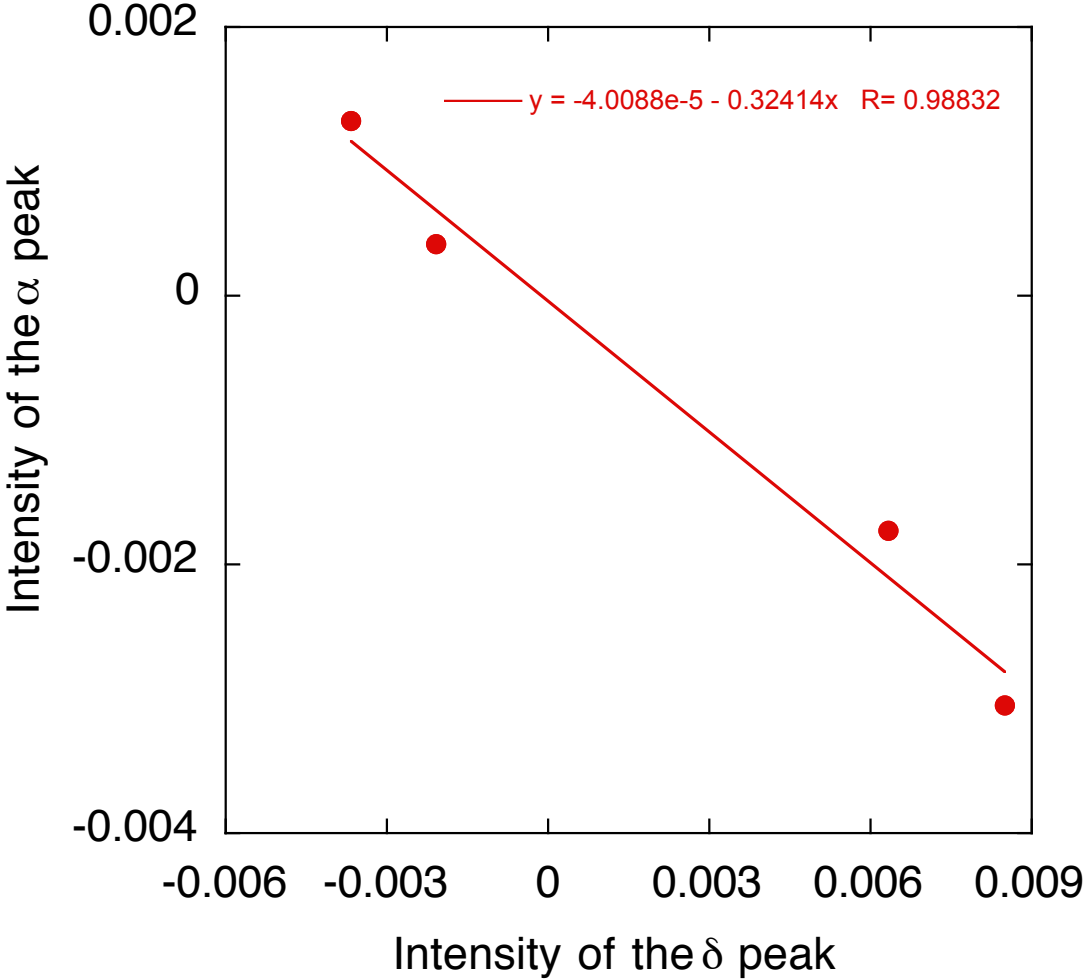

S4. A K-edge XMCD signal compared to the adapted enlargement of the XANES spectrum over the pre-edge/rising edge and edge regions.

a, b) **MnCr** and **MnFe** at the Mn K-edge ; c, d) **FeCr** at the Fe K-edge ; e, f) **CoCr** and **CoFe** at the Co K-edge ; g, h) **NiCr** and **NiFe** at the Ni K-edge ; i, j) **CuFe** at the Cu K-edge.

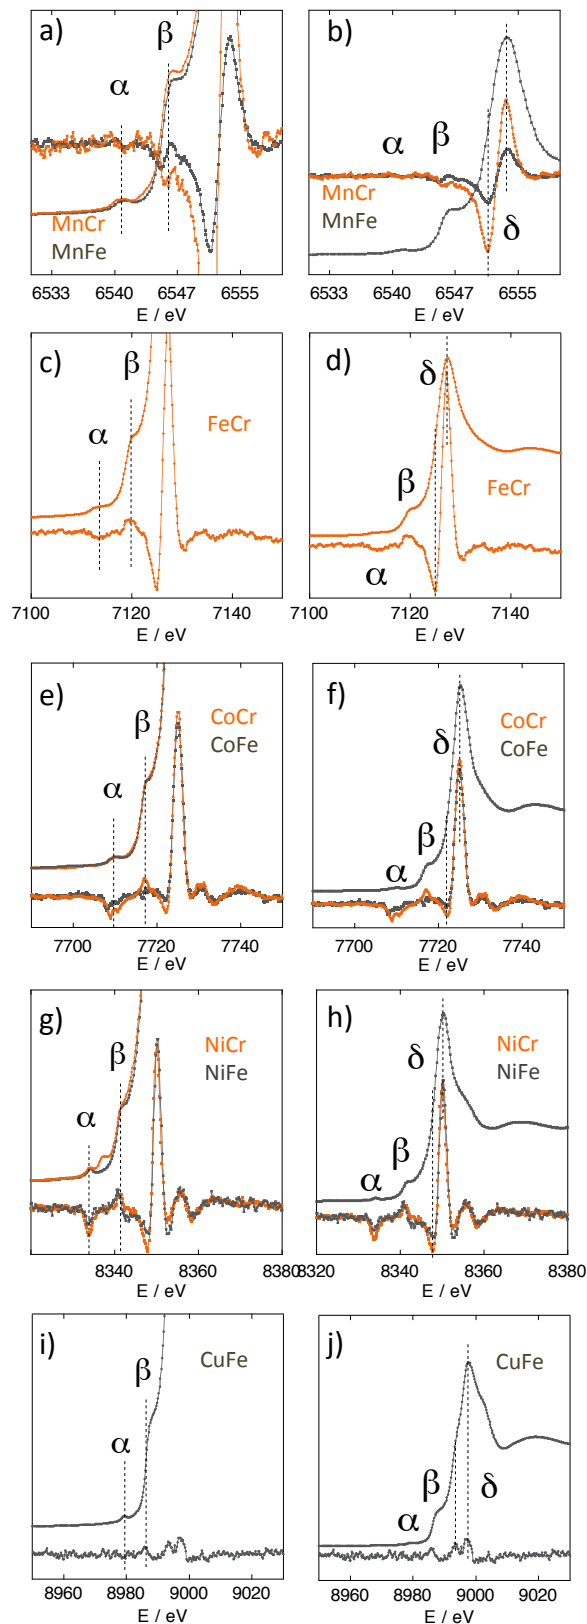

S5. Area under curve for the main  $\delta$  peak of the XMCD signal at the Fe K-edge as a function of its intensity for the **AFe** series.

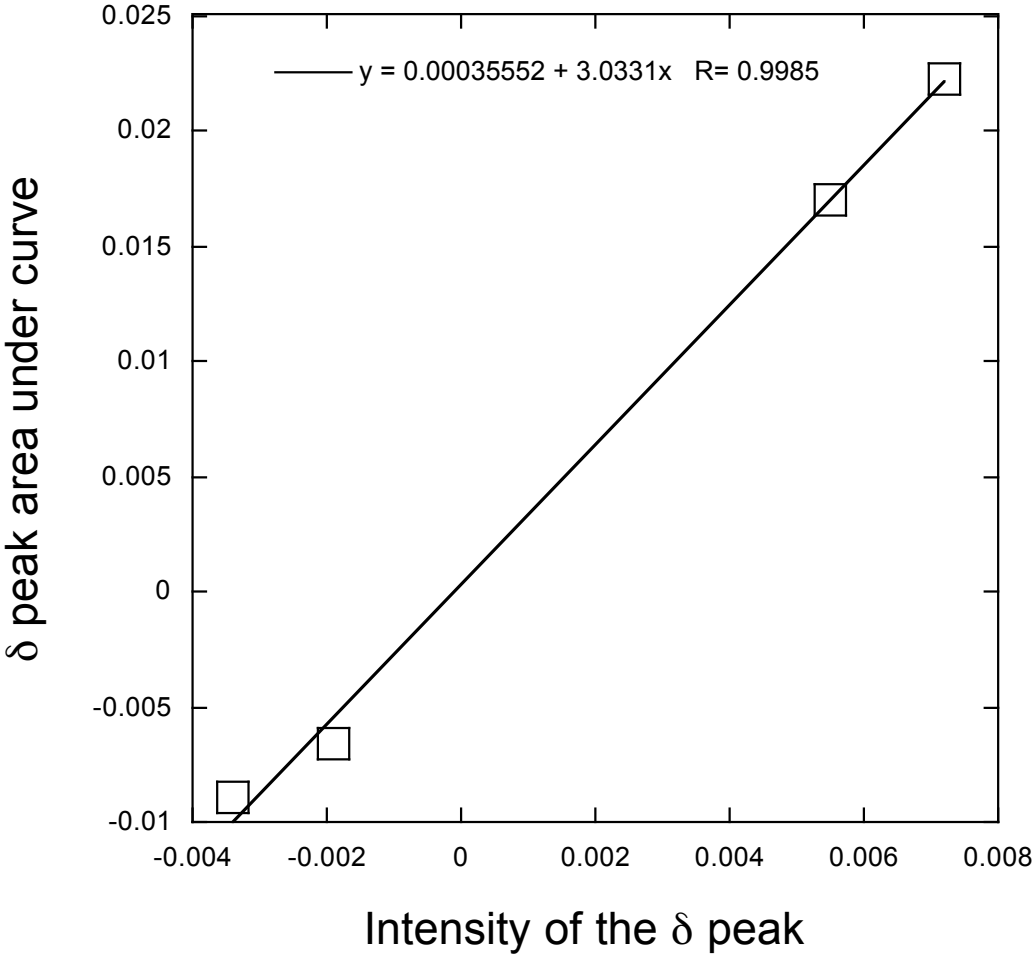

S6. Area under curve for the main  $\delta$  contribution to the XMCD signal at the Cr K-edge as a function of its intensity for the **ACr** series.

a) Area under curve for each lobe ( $\delta_1$  and  $\delta_2$ ) of the XMCD signal as a function of its intensity.

b) Difference between the area under curve of the  $\delta_2$  and  $\delta_1$  lobes as a function of the difference between their intensity.

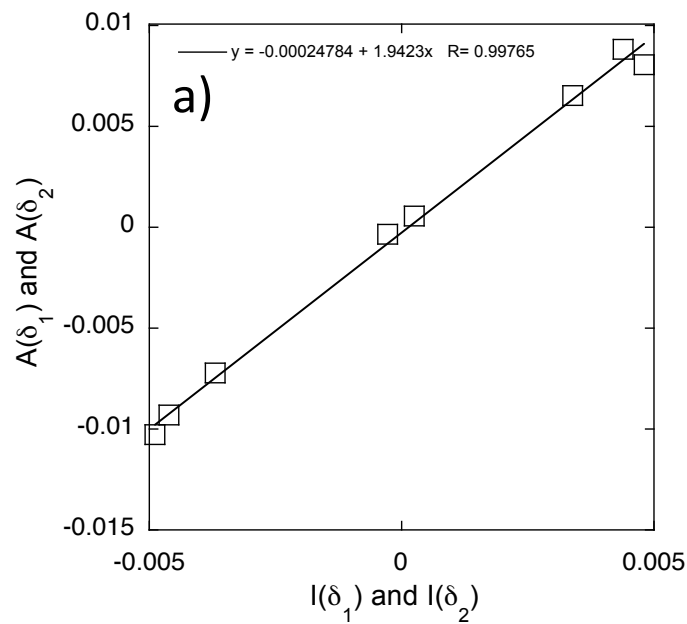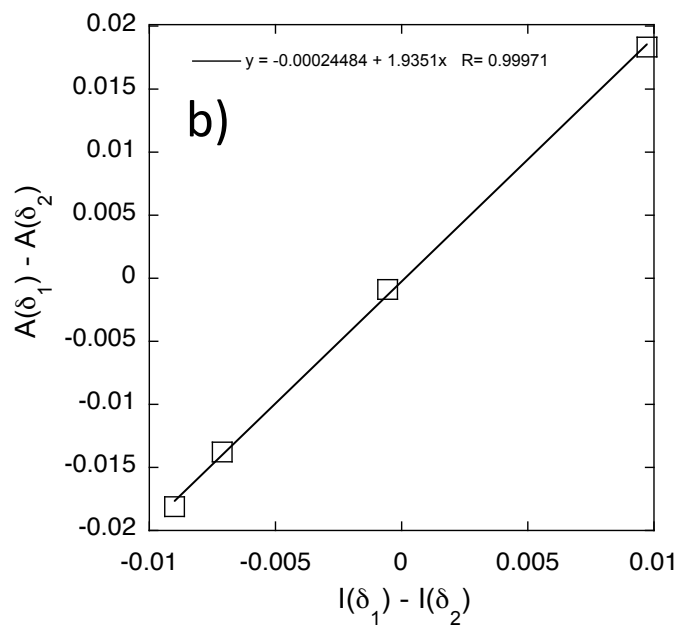



S7. Magnetic field dependence of the magnetization at 4K for a) the **AFe** series and b) the **ACr** series.

The vertical line indicates the magnetic field value used for XMCD measurements (1.3 T).

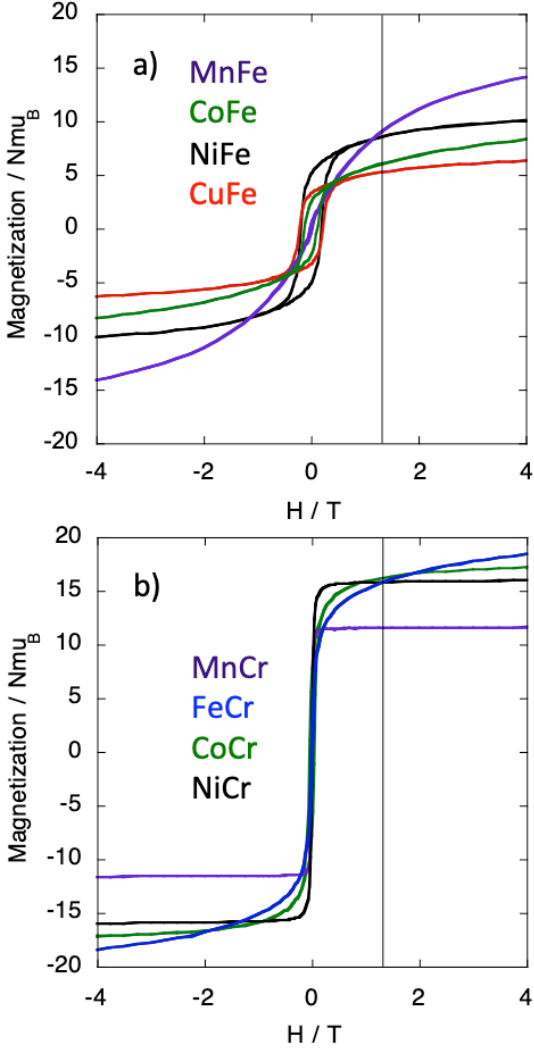

S8. Powder X-ray diffraction of CuFe PBAs containing 0 (**CuFe**, black line) and 4 (**Cs<sub>4</sub>CuFe**, red line) Cs<sup>+</sup> cations inserted in interstitial sites.

The X-ray diffraction pattern of Cs<sub>4</sub>CuFe is characteristic of the tetragonal structure, revealing a cooperative Jahn-Teller distortion with all elongated axes of the Cu<sup>2+</sup> complexes along the same direction, while **CuFe** exhibits the well-known fcc structure of PBAs.

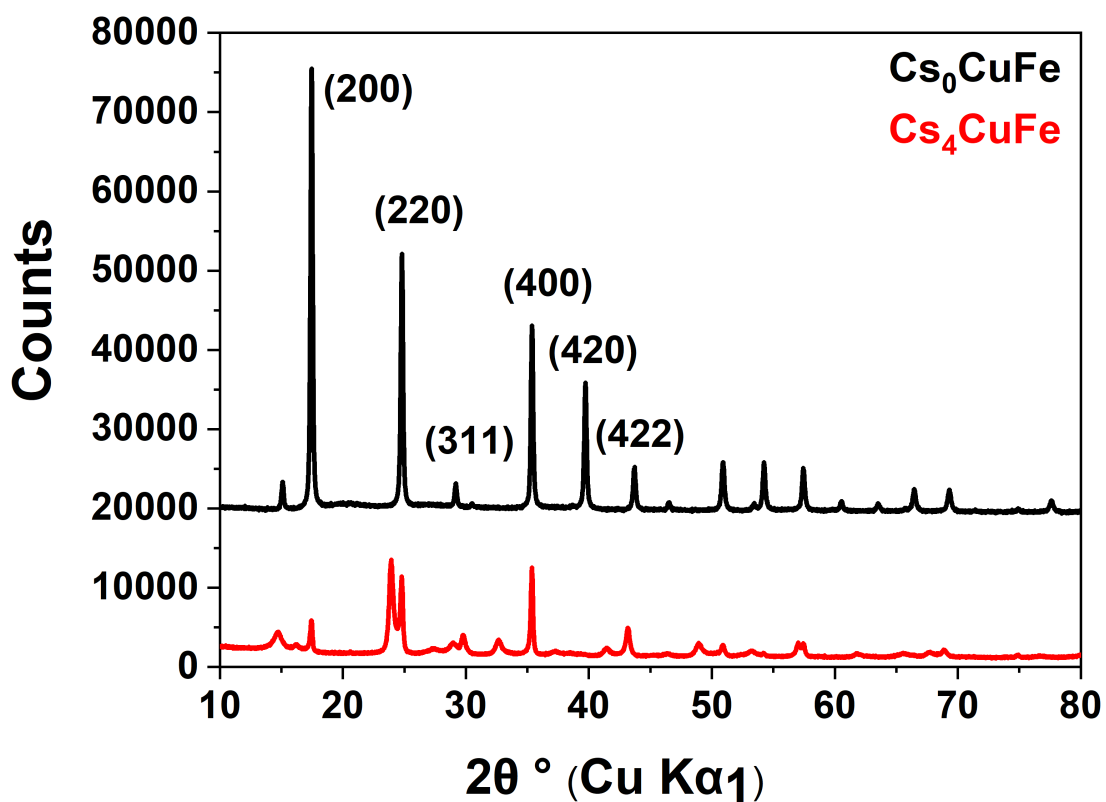

## S9. Ni K-edge XANES spectra of NiFe and NiCr.

The XANES spectra are presented in figure a and figure b displays an enlargement of the spectra over the pre-edge region.

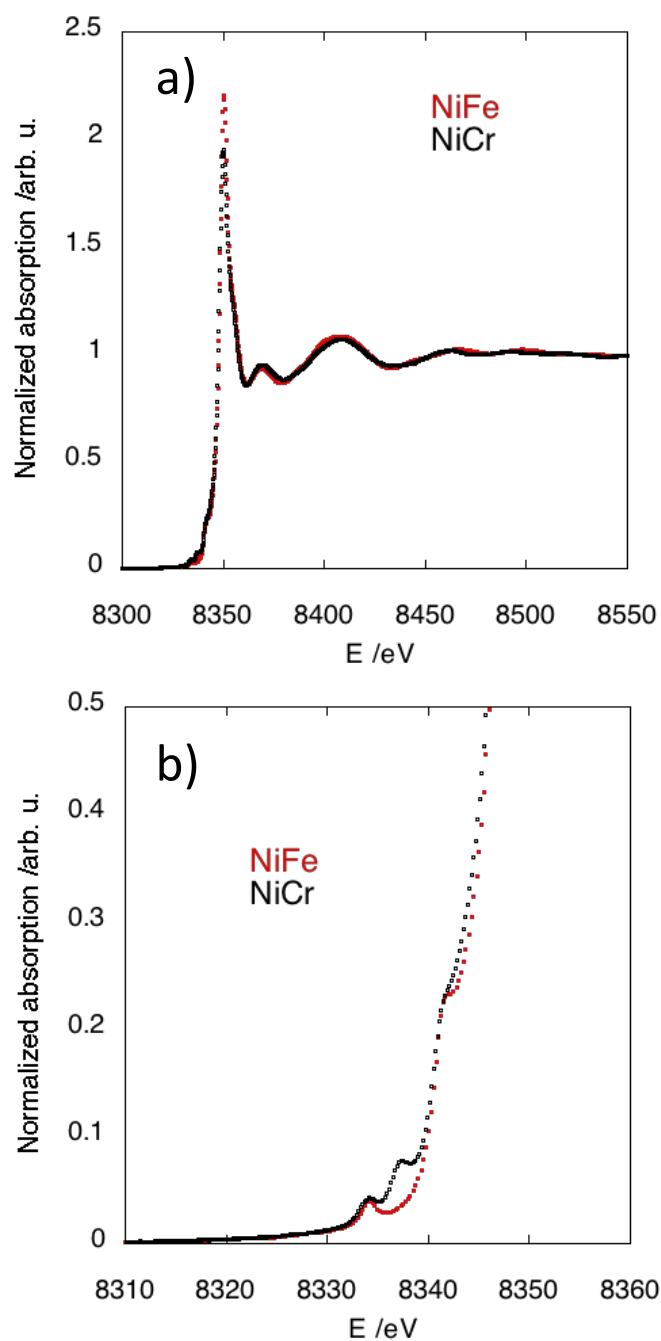

Supplement: ao2c04049_si_001.pdf [file ao2c04049_si_001.pdf]
